# Supplementary material for: Simple synthesis of nitrogen doped graphene/ordered mesoporous metal oxides hybrid architecture as high-performance electrocatalysts for biosensing study
Source: Royal Society of Chemistry journal article supplement (doi:10.1039/c6ra19496f), 2016-01-01
Supplement: c6ra19496f1.pdf [file c6ra19496f1.pdf]

**Simple synthesis of nitrogen doped graphene/ordered mesoporous  
metal oxides hybrid architecture as high-performance  
electrocatalysts for biosensing study**

**Table S1** Results of glucose analysis in serum sample (n=3) on OMCo-NGR/GCE.

| Actual found (mM) | Added (mM) | Found (mM) | Recovery (%) |
|-------------------|------------|------------|--------------|
| 8.28              | 1.5        | 9.76       | 98.67        |
| 5.02              | 3.0        | 8.12       | 103.3        |
| 5.03              | 6.0        | 10.97      | 99.00        |

**Table S2** Results of H<sub>2</sub>O<sub>2</sub> analysis in serum sample (n=3) on OMFe-NGR/GCE.

| Sample | Actual found (μM)<br>[a] | Added (μM) | Found after adding (μM) | Recovery (%) |
|--------|--------------------------|------------|-------------------------|--------------|
| serum  | 20.39                    | 150        | 177.20                  | 104.54       |
|        |                          | 200        | 218.12                  | 98.87        |
|        |                          | 250        | 278.03                  | 103.06       |

[a] 1 : 100 dilution with pH 7.0 PBS.
